# Supplementary material for: Pandemic Influenza A Viruses Escape from Restriction by Human MxA through Adaptive Mutations in the Nucleoprotein
Source: PubMed Central journal article supplement (PMC3610643; doi:10.1371/journal.ppat.1003279), 2013-03-28
Supplement: ppat.1003279.s003.pdf [file ppat.1003279.s003.pdf]

SUPPORTING INFORMATION (Mänz et al.)

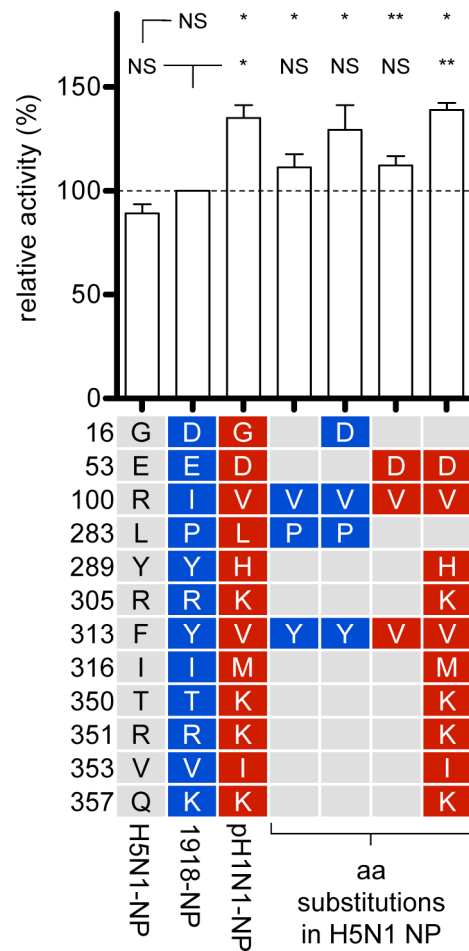

**Fig. S3 Polymerase activities in the presence of the antivirally inactive mutant MxA-T103A.**

H5N1 polymerase reporter activity was determined after co-transfection of expression plasmids coding for the indicated NP mutants (100 ng) and the antivirally inactive mutant MxA-T103A (200 ng). The reporter activity observed with the 1918-NP was set to 100%. Error bars indicate the standard error of the mean of three independent experiments. Student's *t*-test was performed to determine the *P* value. \**P*<0.05, \*\**P*<0.01; NS, not significant.
